# Supplementary material for: In situ investigation of halide co-ion effects on SDS adsorption at air–water interfaces
Source: Royal Society of Chemistry journal article supplement (doi:10.1039/c4sm01041h), 2014-01-01
Supplement: c4sm01041h1.pdf [file c4sm01041h1.pdf]

## In situ investigation of halide co-ion effects on SDS adsorption at air/water interfaces

### Supporting Information

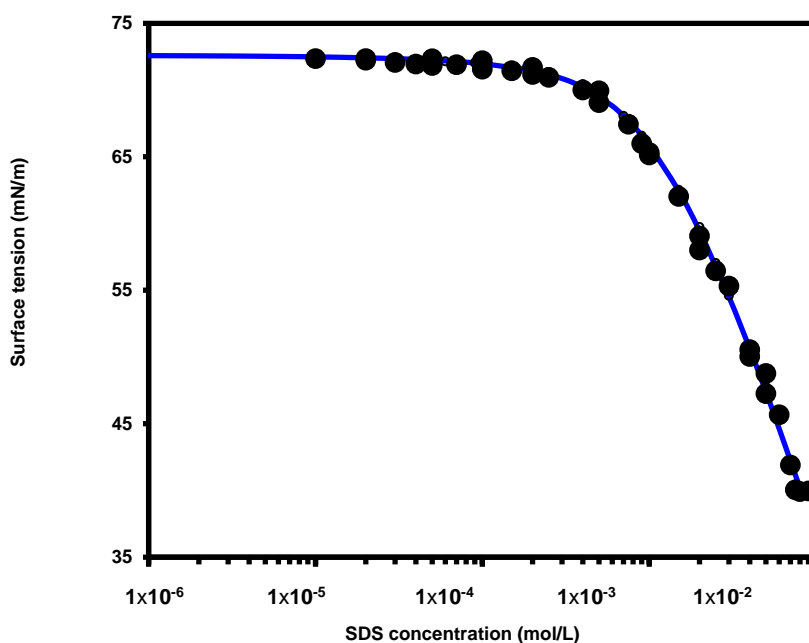

Figure S1: Surface tension of the purified SDS used in this study.

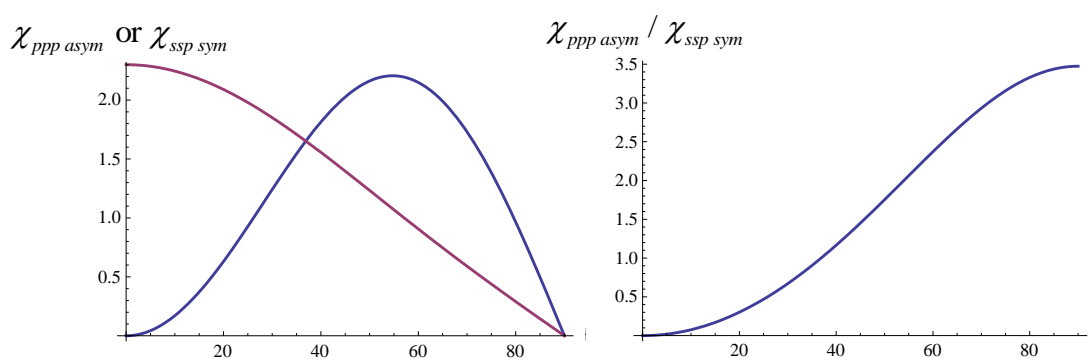

**Figure S2:** *Left:* Functions of macroscopic hyperpolarisability quantities in the laboratory frame versus methyl tilt angle,  $\theta$ . Blue: methyl C-H asymmetric stretch in ppp polarization combination,  $\chi_{ppp\ asym}$ . Maroon: methyl C-H symmetric stretch in ssp polarization combination,  $\chi_{ssp\ sym}$ . *Right:*  $\chi_{ppp\ asym} / \chi_{ssp\ sym}$  as a function of the methyl tilt angle,  $\theta$ .
